# Supplementary material for: Exploration of a one-dimensional iron-based coordination polymer for enhanced lithium storage capabilities
Source: Royal Society of Chemistry journal article supplement (doi:10.1039/d4ce01082e), 2024-12-27
Supplement: d4ce01082e1.pdf [file d4ce01082e1.pdf]

## ***Supporting Information***

### Exploration of One-Dimensional Iron-Based Coordination Polymer for Enhanced Lithium Storage Capabilities

Jingwei Liu<sup>1</sup>, Xiaolong Cheng<sup>1</sup>, Shifa Dang<sup>1</sup>, Weile Kong<sup>2</sup>, Mengxian  
Zheng<sup>1</sup>, Lei Zhang<sup>1</sup>, Shuangyan Wu<sup>2\*</sup>, Ning Liu<sup>3\*</sup>, Jinchao Cao<sup>4\*</sup>

1. Hebei Key Laboratory of Low Carbon and High Efficiency Power Generation  
Technology, North China Electric Power University, Baoding 071003, Hebei, China.

2. Key Laboratory of Inorganic Molecule-Based Chemistry of Liaoning Province and  
Laboratory of Coordination Chemistry, Shenyang University of Chemical Technology,  
Shenyang, 110142, China.

3. Key Laboratory of Advanced Energy Materials Chemistry (MOE), Frontiers Science  
Center for New Organic Matter and State Key Laboratory of Advanced Chemical Power  
Sources, College of Chemistry, Nankai University, Tianjin 300071, China.

4. Binzhou Institute of Technology, Weiqiao-UCAS Science and Technology Park,  
Binzhou, 256606, Shandong, China.

\*Corresponding author. E-mail address: wushuangyan90@syuct.edu.cn (Shuangyan Wu);  
Ning Liu (1337199177@qq.com); caojinchao@wqucas.com (Jinchao Cao)

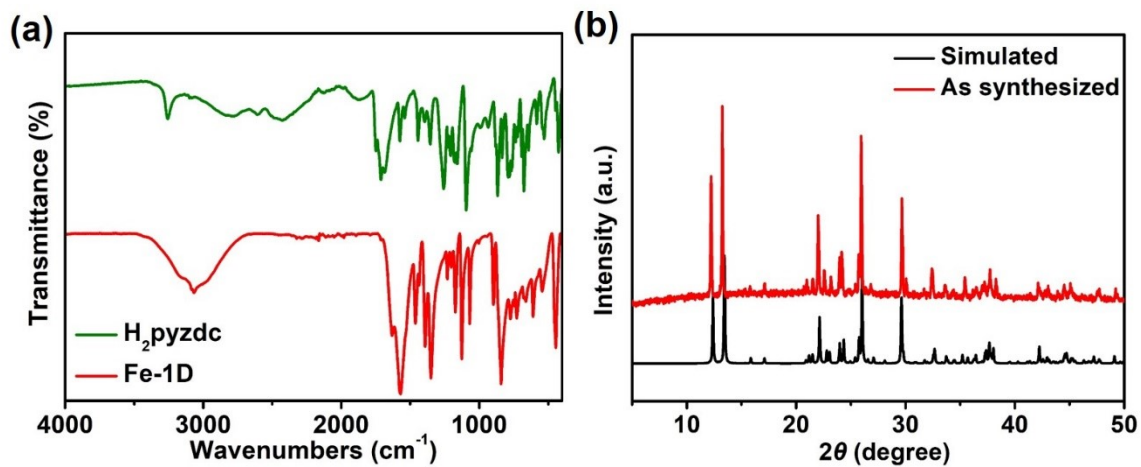

**Figure S1.** (a) Infrared spectra of Fe-1D, (b) PXRD of Fe-1D.

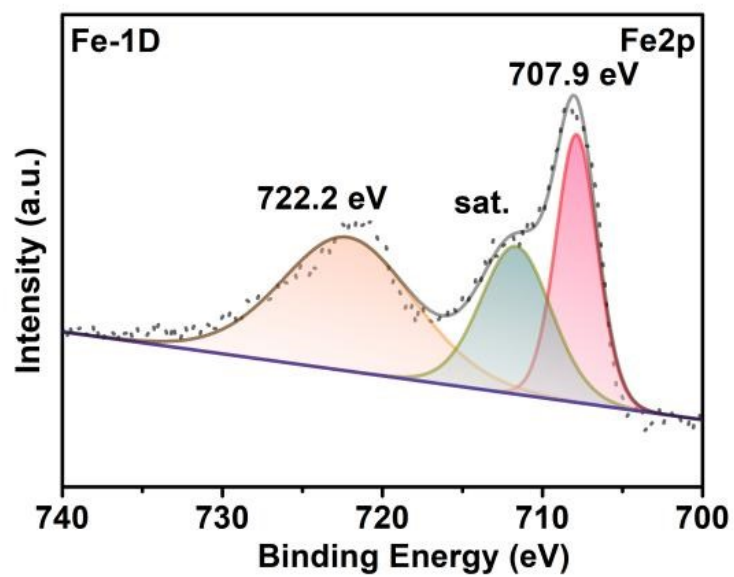

**Figure S2.** Fe 2p high-resolution XPS spectrum of Fe-1D.

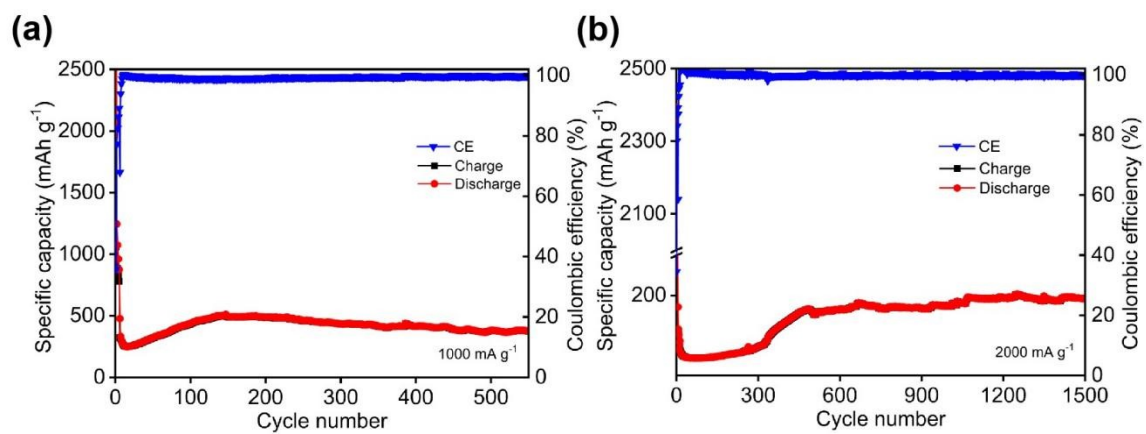

**Figure S3.** (a) Charge-discharge profiles at 1000mA g<sup>-1</sup>, (b) Charge-discharge profiles at 2000mA g<sup>-1</sup>.

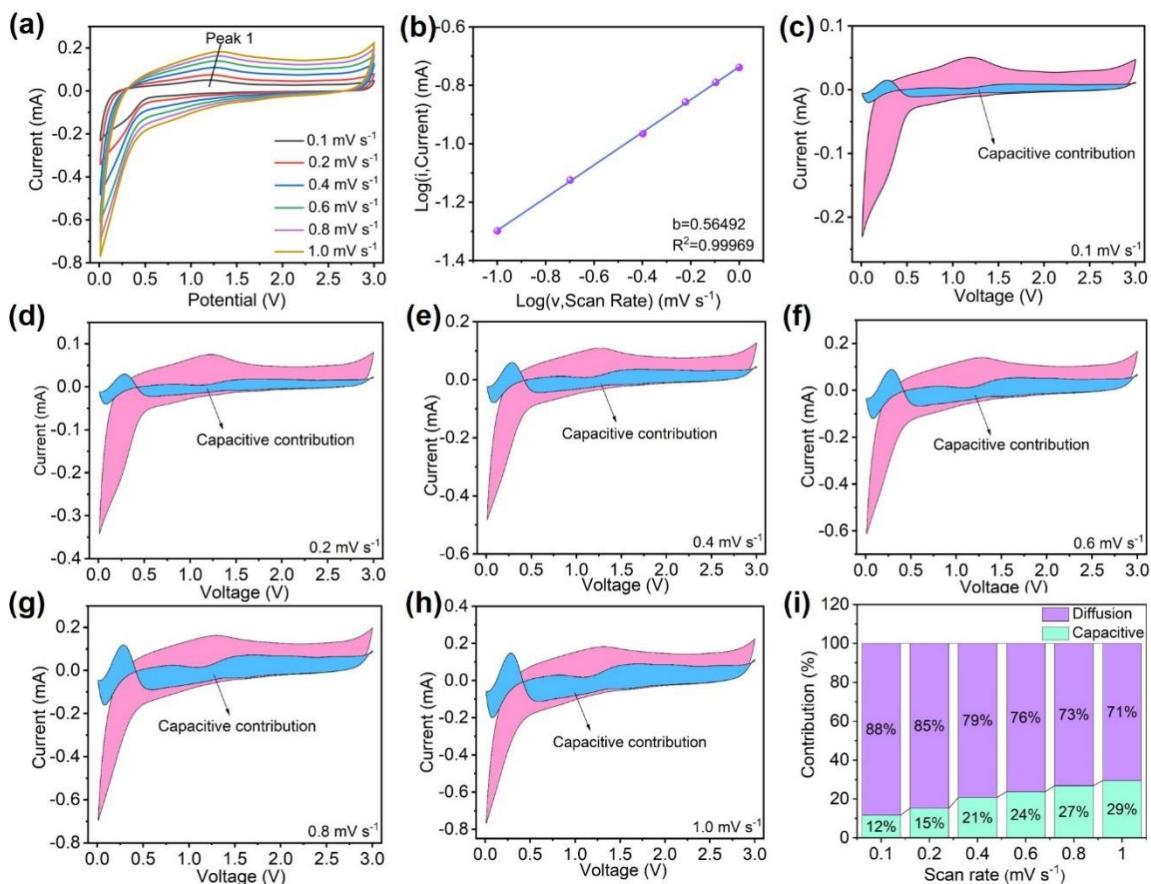

**Figure S4.** (a) CV curves at different scan rates of Fe-1D, (b) Log (i) vs log (v) plots at specific peak current of Fe-1D, (c-h) Pseudo-capacitance control contribution at 0.1, 0.2, 0.4, 0.6, 0.8, 1.0  $\text{mV}\cdot\text{s}^{-1}$  as a percentage of the total capacity contribution of Fe-1D, (i)

The relative contributions of pseudocapacitive capacities and diffusion-controlled capacities at various scan rates.

(a)

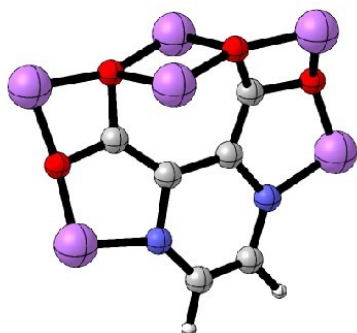

(b)

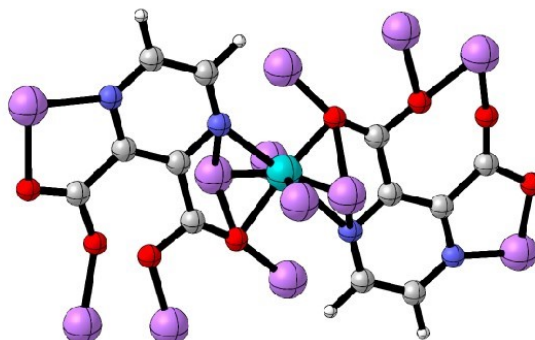

**Figure S5.** Theoretical lithium storage sites of (a) 2,3-Pyrazinedicarboxylic acid and (b)

Fe-1D.

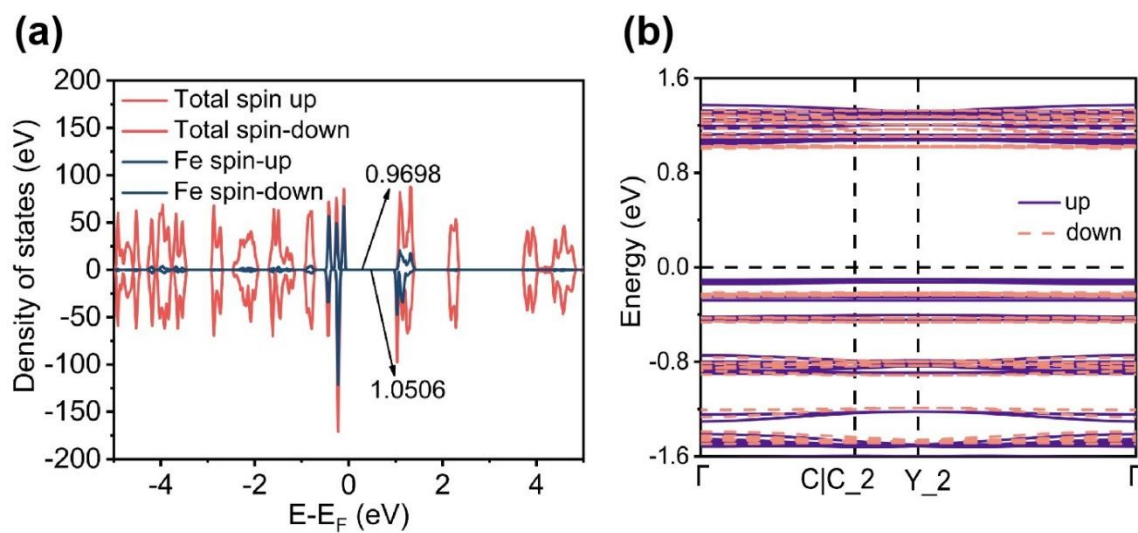

**Figure S6.** (a) Density of states (DOS) and (b) Electronic band structure of Fe-1D.

**Table S1.** Calculated theoretical capacities and LUMO/HOMO energy levels of the selected aromatic ligands

|                                             |                                                                                   |                                                                                    |                                                                                     |                                                                                     |                                                                                     |                                                                                     |
|---------------------------------------------|-----------------------------------------------------------------------------------|------------------------------------------------------------------------------------|-------------------------------------------------------------------------------------|-------------------------------------------------------------------------------------|-------------------------------------------------------------------------------------|-------------------------------------------------------------------------------------|
| Structure                                   |  |  |  |  |  |  |
| Molecular formula                           | C <sub>6</sub> H <sub>6</sub> O                                                   | C <sub>7</sub> H <sub>6</sub> O                                                    | C <sub>7</sub> H <sub>6</sub> O <sub>2</sub>                                        | C <sub>8</sub> H <sub>6</sub> O <sub>4</sub>                                        | C <sub>7</sub> H <sub>5</sub> NO <sub>4</sub>                                       | C <sub>6</sub> H <sub>4</sub> N <sub>2</sub> O <sub>4</sub>                         |
| Theoretical number of Li uptake             | 1                                                                                 | 1                                                                                  | 2                                                                                   | 4                                                                                   | 5                                                                                   | 6                                                                                   |
| Theoretical Capacity (mAh g <sup>-1</sup> ) | 285                                                                               | 253                                                                                | 439                                                                                 | 646                                                                                 | 801                                                                                 | 956                                                                                 |
| LUMO (Hartree)                              | -0.002                                                                            | -0.069                                                                             | -0.057                                                                              | -0.069                                                                              | -0.076                                                                              | -0.099                                                                              |
| HOMO (Hartree)                              | -0.242                                                                            | -0.257                                                                             | -0.265                                                                              | -0.277                                                                              | -0.279                                                                              | -0.268                                                                              |
| Energy level gap (eV)                       | 6.53                                                                              | 5.11                                                                               | 5.66                                                                                | 5.64                                                                                | 5.52                                                                                | <b>4.6</b>                                                                          |

1 Hartree = 27.211386230 eV



**Table S2.** Crystallographic data and refinement parameters

|                                             |                                                                 |
|---------------------------------------------|-----------------------------------------------------------------|
| Empirical formula                           | C <sub>12</sub> H <sub>8</sub> FeN <sub>4</sub> O <sub>10</sub> |
| Formula weight                              | 424.07                                                          |
| Temperature/K                               | 298                                                             |
| Crystal system                              | monoclinic                                                      |
| Space group                                 | I2/a                                                            |
| a/Å                                         | 14.9219(19)                                                     |
| b/Å                                         | 8.4923(7)                                                       |
| c/Å                                         | 13.0852(17)                                                     |
| α/°                                         | 90                                                              |
| β/°                                         | 118.145(17)                                                     |
| γ/°                                         | 90                                                              |
| Volume/Å <sup>3</sup>                       | 1462.1(4)                                                       |
| Z                                           | 4                                                               |
| ρ <sub>calc</sub> /cm <sup>3</sup>          | 1.927                                                           |
| μ/mm <sup>-1</sup>                          | 1.104                                                           |
| F(000)                                      | 856                                                             |
| Radiation                                   | MoKα (λ = 0.71073)                                              |
| 2θ range for data collection/°              | 5.71 to 52.994                                                  |
| Index ranges                                | -17 ≤ h ≤ 18, -10 ≤ k ≤ 10, -15 ≤ l ≤ 16                        |
| Reflections collected                       | 4511                                                            |
| Independent reflections                     | 1515 [R <sub>int</sub> = 0.0385, R <sub>sigma</sub> = 0.0701]   |
| Data/restraints/parameters                  | 1515/0/126                                                      |
| Goodness-of-fit on F <sup>2</sup>           | 1.025                                                           |
| Final R indexes [I >= 2σ (I)]               | R <sub>1</sub> = 0.0465, wR <sub>2</sub> = 0.1151               |
| Final R indexes [all data]                  | R <sub>1</sub> = 0.0707, wR <sub>2</sub> = 0.1241               |
| Largest diff. peak/hole / e Å <sup>-3</sup> | 0.54/-0.53                                                      |

**Table S3.** The hydrogen bond parameters

| D-H···A         | D-H (Å) | H···A (Å) | D···A (Å) | D-H-A (°) |
|-----------------|---------|-----------|-----------|-----------|
| O(4)-H4···O(5)  | 0.82    | 1.69      | 2.489     | 166       |
| O(5)-H5A···O(1) | 0.85    | 1.72      | 2.524     | 158       |
| O(5)-H5B···N(2) | 0.85    | 1.91      | 2.755     | 174       |

**Table S4.** The simulated values for impedance spectra before and after 140 cycles

| Sample           | R <sub>1</sub> | R <sub>2</sub> | C <sub>1</sub>        | R <sub>ct</sub> | C <sub>2</sub>        | W <sub>1-R</sub> | W <sub>1-T</sub> | W <sub>1-P</sub> |
|------------------|----------------|----------------|-----------------------|-----------------|-----------------------|------------------|------------------|------------------|
| As assembled     | 4.385          | 63.3           | 7.69×10 <sup>-7</sup> | 307             | 2.81×10 <sup>-6</sup> | 36.53            | 0.60             | 0.37             |
| After 140 cycles | 10.04          | 12.75          | 6.43×10 <sup>-7</sup> | 20.21           | 2.77×10 <sup>-5</sup> | 20.39            | 0.43             | 0.37             |

**Table S5.** Cartesian coordinates for 2,3-Pyrazinedicarboxylicacid lithium storage.

| Cartesian coordinates for H <sub>2</sub> pyzdc in lithium storage state |             |           |           |         |             |           |           |
|-------------------------------------------------------------------------|-------------|-----------|-----------|---------|-------------|-----------|-----------|
| Element                                                                 | Coordinates |           |           | Element | Coordinates |           |           |
|                                                                         | X           | Y         | Z         |         | X           | Y         | Z         |
| C                                                                       | -0.608466   | -2.765617 | 0.209386  | O       | 2.985352    | 0.660865  | -0.222401 |
| C                                                                       | 0.699153    | -2.758312 | -0.187117 | C       | -1.611892   | 0.625924  | -0.243653 |
| N                                                                       | 1.420167    | -1.570464 | -0.255792 | O       | -2.994979   | 0.462525  | -0.101306 |
| C                                                                       | 0.767202    | -0.376939 | -0.115026 | O       | -1.314437   | 2.020576  | -0.405093 |
| C                                                                       | -0.715961   | -0.382383 | 0.050323  | Li      | 0.385661    | 2.340653  | -0.969262 |
| N                                                                       | -1.337848   | -1.625766 | 0.423026  | Li      | 2.967953    | 1.938533  | 1.003171  |
| H                                                                       | -1.123887   | -3.705771 | 0.384596  | Li      | -3.120411   | 2.208651  | -0.413433 |
| H                                                                       | 1.247454    | -3.674345 | -0.365935 | Li      | -0.437502   | 1.724761  | -0.413433 |
| C                                                                       | 1.563023    | 0.799907  | -0.230478 | Li      | 3.203638    | -1.053584 | -0.413433 |
| O                                                                       | 1.216778    | 1.983109  | 0.632961  | Li      | -3.132627   | -1.198476 | -0.413433 |

**Table S6.** Cartesian coordinates for Fe-1D lithium storage.

| Cartesian coordinates for Fe-1D in lithium storage state |             |           |           |         |             |           |           |
|----------------------------------------------------------|-------------|-----------|-----------|---------|-------------|-----------|-----------|
| Element                                                  | Coordinates |           |           | Element | Coordinates |           |           |
|                                                          | X           | Y         | Z         |         | X           | Y         | Z         |
| C                                                        | -4.267539   | 0.617647  | 0.004618  | O       | -3.332715   | -2.029725 | -0.078487 |
| C                                                        | 2.876032    | -0.352126 | 0.096159  | C       | -5.30412    | -0.540792 | 0.046475  |
| N                                                        | 1.964415    | -1.344018 | 0.160857  | O       | -5.137745   | -1.759744 | 0.040299  |
| C                                                        | 2.449187    | -2.602284 | 0.133645  | O       | -6.577726   | -0.079846 | 0.129339  |
| C                                                        | 3.840711    | -2.867823 | 0.042089  | C       | 5.298484    | 0.524018  | -0.068557 |
| N                                                        | 4.752274    | -1.875946 | -0.022606 | O       | 6.52524     | 0.479355  | -0.150018 |
| H                                                        | 1.711046    | -3.419737 | 0.186068  | O       | 4.714157    | 1.748277  | -0.034499 |
| H                                                        | 4.227932    | -3.900023 | 0.020451  | Fe      | 0.068356    | -0.154514 | 0.028234  |
| C                                                        | 2.335219    | 1.089474  | 0.126361  | Li      | -1.225114   | 0.099533  | 1.066233  |
| O                                                        | 1.177836    | 1.499772  | 0.201739  | Li      | 1.525839    | 0.181283  | -0.914471 |
| O                                                        | 3.327045    | 2.012957  | 0.056575  | Li      | -0.099004   | -0.102382 | -1.428999 |
| C                                                        | -2.454845   | 2.585531  | -0.155768 | Li      | 0.255011    | 0.129689  | 1.655052  |
| C                                                        | -3.846357   | 2.851053  | -0.064227 | Li      | -2.617331   | -3.778632 | -0.119494 |
| N                                                        | -4.757974   | 1.859416  | 0.000471  | Li      | 0.157802    | -2.625928 | -0.662981 |
| C                                                        | -4.273202   | 0.600894  | -0.026741 | Li      | 2.611648    | 3.761864  | 0.097151  |
| C                                                        | -2.881678   | 0.335356  | -0.118297 | Li      | -0.330886   | 2.510181  | 0.129655  |
| N                                                        | -1.970115   | 1.327232  | -0.182992 | Li      | -4.516662   | -3.418516 | 0.524054  |
| H                                                        | -1.716687   | 3.402971  | -0.208162 | Li      | 4.869813    | 3.758316  | 0.118641  |
| H                                                        | -4.233577   | 3.883233  | -0.042602 | Li      | 6.812142    | -1.608313 | 0.019293  |
| C                                                        | -2.340875   | -1.106247 | -0.148517 | Li      | -6.637758   | 1.777408  | -0.186783 |
| O                                                        | -1.183495   | -1.516551 | -0.223908 |         |             |           |           |

**Table S7.** The basic electrochemical properties of the Fe-based anode materials.

| Electrode materials                                                                             | Capacity (mAh g <sup>-1</sup> ) | Current density (mA g <sup>-1</sup> ) | Cycle number | Voltage (V) | Refs      |
|-------------------------------------------------------------------------------------------------|---------------------------------|---------------------------------------|--------------|-------------|-----------|
| Fe-ZIF@C                                                                                        | 719                             | 100                                   | 100          | 0.01-2.5    | 1         |
| Fe <sub>3</sub> O <sub>4</sub> @C                                                               | 570                             | 100                                   | 60           | 0.01-3      | 2         |
| [Fe(C <sub>5</sub> O <sub>5</sub> )(H <sub>2</sub> O) <sub>3</sub> ] <sub>n</sub> ( <b>1D</b> ) | 521                             | 100                                   | 140          | 0.01-2.4    | 3         |
| Ti <sub>0.9</sub> Fe <sub>1.1</sub> O <sub>3</sub>                                              | 454.9                           | 100                                   | 500          | 0.01-2.5    | 4         |
| Fe <sub>3</sub> O <sub>4</sub> /GN (15%)                                                        | 825                             | 100                                   | 100          | 0.01-3      | 5         |
| MIL-88B(Fe)                                                                                     | 189                             | 200                                   | 100          | 0.1-3       | 6         |
| Fe <sub>2</sub> (SO <sub>4</sub> ) <sub>3</sub>                                                 | 540                             | 1000                                  | 100          | 0.01-3      | 7         |
| Fe <sub>3</sub> O <sub>4</sub> @CTP QDs-2                                                       | 810                             | 100                                   | 200          | 0.01-3      | 8         |
| Fe <sub>3</sub> O <sub>4</sub>                                                                  | 108                             | 100                                   | 200          | 0.01-3      | 8         |
| semi-crystalline Fe-MOF                                                                         | 854                             | 85                                    | 100          | 0.01-3      | 9         |
| Fe-1D                                                                                           | 833                             | 200                                   | 300          | 0.01-3      | this work |

***Theoretical methods and computational details:***

Band structure analysis and the corresponding projected density of states (PDOS) calculations for Fe-1D were conducted using the Vienna Ab initio Simulation Package (VASP).<sup>10,11</sup> For the electronic structure calculations, the Generalized Gradient Approximation (GGA) in conjunction with the Perdew-Burke-Ernzerhof (PBE) functional<sup>12</sup> was employed. The kinetic energy cut-off was set to 400 eV, and the K-point mesh was configured as 2 x 3 x 2. The optimization process was terminated when both the energy and force criteria converged to  $1.0 \times 10^{-5}$  eV and  $0.02$  eV/Å, respectively.

Calculations pertaining to HOMO/LUMO and ESP for both H2pyzdc and Fe-1D were executed using Gaussian 16 software.<sup>13</sup> Geometric optimization and frequency analysis were carried out employing the B3LYP functional, in conjunction with a hybrid basis set: SDD for Co and Ni atoms,<sup>14</sup> and 6-311+G(d)<sup>15</sup> for C, H, N, and O atoms.

**References:**

- [1] J. Nie, Z. Li, G. Shi, J. Wang, S. Yao, "Fe-ZIF@C with Porous Nanostructure as Anode Material for Lithium-Ion Batteries," *Journal of Electronic Materials* 50 (2021): 2831-2839.
- [2] J. Wang, M. Gao, H. Pan, et al., "Chemical vapor deposition prepared bi-morphological carbon-coated Fe<sub>3</sub>O<sub>4</sub> composites as anode materials for lithium-ion batteries," *Journal of Power Sources* 282 (2015): 257-264.
- [3] L. Zhang, X. Zhang, Y. Gui, "One-Dimensional Croconate-Based Fe-CP as a High-Performance Anode Material for Lithium-Ion Batteries," *Polymers* 15.18 (2023): 3728.
- [4] J. Yang, J. Hou, M. Xu, et al., "Improved cycle capability of Titanium-doped Fe<sub>2</sub>O<sub>3</sub> anode material for Li-ion batteries," *Journal of Alloys and Compounds* 722 (2017): 414-419.
- [5] J. Jiao, W. Qiu, L. Chen, et al., "Synthesis of well-defined Fe<sub>3</sub>O<sub>4</sub> nanorods/N-doped graphene for lithium-ion batteries," *Nano research* 9 (2016): 1256-1266.
- [6] D. Pukazhselvan, CM. Granadeiro, G. Gonçalves, et al., "Comparative analyses of MIL-88B (Fe) and MIL-100 (Fe) metal organic frameworks as active anode materials for Li ion batteries," *Electrochimica Acta* 465 (2023): 142989.
- [7] J. Yao, B. Huang, J. Jiang, et al., "Electrochemical performance of Fe<sub>2</sub>(SO<sub>4</sub>)<sub>3</sub> as a novel anode material for lithium-ion batteries," *Journal of Alloys and Compounds* 886 (2021): 161238.



- [8] F. Shi, Q. Liu, C. Zhang, et al., "A facile method to prepare Fe<sub>3</sub>O<sub>4</sub>@CTP QDs composite as advanced anode material for lithium ion batteries," *Journal of Alloys and Compounds* 890 (2022): 161911.
- [9] L. Moutanassim, M. Aqil, S. El. Hankari, et al., "Disordered and defective semi-crystalline Fe-MOF as a high-power and high-energy anode material for lithium-ion batteries," *Journal of Energy Storage* 93 (2024): 112055.
- [10] G. Kresse, J. Hafner, "Ab initio molecular-dynamics simulation of the liquid-metal–amorphous-semiconductor transition in germanium," *Physical Review B* 49 (1994): 14251.
- [11] G. Kresse, J. Furthmüller, "Efficiency of ab-initio total energy calculations for metals and semiconductors using a plane-wave basis set," *Computational materials science* 6 (1996): 15-50.
- [12] J. P. Perdew, K. Burke, M. Ernzerhof, "Generalized gradient approximation made simple," *Physical review letters* 77 (1996): 3865.
- [13] M. J. Frisch, G. W. Trucks, H. B. Schlegel, et al., "Gaussian 16. Revision C.01 Gaussian Inc.," *Wallingford, CT, USA. 2016.*
- [14] C. Lee, W. Yang, R. G. Parr, "Development of the Colle-Salvetti correlation-energy formula into a functional of the electron density," *Physical review B* 37 (1988): 785.
- [15] D. Andrae, U. Haeussermann, M. Dolg, et al., "Energy-adjusted ab initio pseudopotentials for the second and third row transition elements," *Theoretica chimica acta* 77 (1990): 123-141.
